1 **Article type:** Original Article

2 **Running head:** Andean effect on the swan orchids biogeography

3

4 **THE IMPROBABLE JOURNEYS OF EPIPHYTIC PLANTS ACROSS THE**  
5 **ANDES: HISTORICAL BIOGEOGRAPHY OF *CYCNOCHES* (CATASETINAE,**  
6 **ORCHIDACEAE)**

7

8 Oscar Alejandro Pérez-Escobar<sup>1\*†</sup>, Marc Gottschling<sup>1</sup>, Guillaume Chomicki<sup>1</sup>, Fabien L.  
9 Condamine<sup>2</sup>, Bente Klitgård<sup>3</sup>, Emerson Pansarin<sup>4</sup> and Günter Gerlach<sup>5\*</sup>

10

11 <sup>1</sup>*Department Biologie, Systematische Botanik und Mykologie, GeoBio-Center, Ludwig-*  
12 *Maximilians Universität, Menzinger Straße 67, D - 80638, Munich, Germany*

13 <sup>2</sup>*CNRS, UMR 5554 Institut de Sciences de l'Evolution (Université de Montpellier),*  
14 *Place Eugène Bataillon, 34095 Montpellier, France*

15 <sup>3</sup>*Identification and Naming department, Royal Botanic Gardens, Kew, TW9 3AB,*  
16 *Surrey, UK.*

17 <sup>4</sup>*Departamento de Biologia, Faculdade de Filosofia, Ciências e Letras, Universidade de*  
18 *Sao Paulo, Ribeirao Preto, SP, 14040-901, Brazil*

19 <sup>4</sup>*Botanischer Garten München, Menzinger Straße 61, D - 80638, Munich, Germany*

20 <sup>†</sup>*Current address: Identification and Naming department, Royal Botanic Gardens, Kew,*  
21 *TW9 3AB, Surrey, UK*

22 <sup>\*</sup>*Corresponding author: [gerlach@extern.lrz-muenchen.de](mailto:gerlach@extern.lrz-muenchen.de); [o.perez-escobar@kew.org](mailto:o.perez-escobar@kew.org)*

23

24 **Number of words:** 4101 (main text) and 7052 (including references and captions)

25 **Number of figures:** 4

26 **Number of tables:** 2

27 **Abstract [200 words]:**

28 The Andean uplift is one of the major orographic events in the New World and has  
29 impacted considerably the diversification of numerous Neotropical organisms. Despite  
30 its importance for biogeography, the specific role of mountain ranges as a dispersal  
31 barrier between South and Central American lowland plant lineages is still poorly  
32 understood. The swan orchids (*Cycnoches*) comprise *ca* 34 epiphytic species distributed  
33 in lowland and pre-montane forests of Central and South America. Here, we study the  
34 historical biogeography of *Cycnoches* to better understand the impact of the Andean  
35 uplift on the diversification of Neotropical lowland plant lineages. Using novel  
36 molecular sequences (five nuclear and plastid regions) and twelve biogeographic  
37 models with and without founder-event speciation, we infer that the most recent  
38 common ancestor of *Cycnoches* may have originated in Amazonia *ca* 5 Mya. The first  
39 colonization of Central America occurred from a direct migration event from Amazonia,  
40 and multiple bidirectional trans-Andean migrations between Amazonia and Central  
41 America took place subsequently. Notably, such biological exchange occurred well after  
42 major mountain building periods. The Andes have not acted as an impassable barrier for  
43 epiphytic lowland lineages such as orchids having a great potential for effortless  
44 dispersal because of the very light, anemochorous seeds.

45

46 **Key words:** ancestral area, Andean uplift, barrier, dispersal, historical biogeography,  
47 molecular clock.

48

49

50 **Introduction**

51 Neotropical landscape and biodiversity have long drawn the attention of  
52 naturalists<sup>1,2</sup>. The tropical Andes are of particular interest as the world's premier  
53 biodiversity hotspot, with both an extraordinary species richness and a remarkable level  
54 of endemism<sup>3-5</sup>. The combination of molecular phylogenies with species distributions  
55 and the fossil record has uncovered different biotic and abiotic factors that fostered  
56 diversification in the Neotropics<sup>6-10</sup>. However, biogeographical studies applying  
57 modern phylogenetic methods are only available for few Neotropical plant clades (e.g.,  
58 *Begonia*<sup>11</sup>, *Cyathostegia*<sup>12</sup>, *Heliotropium*<sup>13</sup>, *Lupinus*<sup>14,15</sup>, palms<sup>16</sup>, Rubiaceae<sup>6</sup>). These  
59 studies have generally demonstrated the importance of geological processes such as  
60 mountain building and establishing the Isthmus of Panama for the diversification of  
61 Neotropical plants<sup>17</sup>.

62 One of the most biologically relevant abiotic processes in the diverse geological  
63 history of the Americas is the rise of the Andes<sup>7,13,18</sup>. Andean mountain building was  
64 driven by plate tectonic re-adjustments that started during the Palaeogene and continued  
65 until the Pliocene<sup>7</sup>. The fossil record (e.g., palynological<sup>3,19</sup> and geological data:  
66 isotope measurements<sup>20</sup>, sediment loads, apatite fission-track data<sup>7</sup>) collectively indicate  
67 that the Andean uplift was a partially constant process punctuated by periods of  
68 intensified mountain building. Two of the most intense uplift periods occurred around  
69 12 (mid-Miocene) and 4.5 million years ago (Mya; early Pliocene<sup>7</sup>). During these  
70 periods, the Northern Andes reached elevations as high as 4500 m in the Pliocene,  
71 whereas the Central Andes already peaked an altitude of 4500 m during the mid-  
72 Miocene<sup>7,21</sup>.

73 Newly formed mountain ranges may had a strong impact on the adjacent  
74 Amazonian landscapes and the inhabiting organisms due to the transformation of its

75 drainage systems<sup>22</sup>. The Andes also influenced local and regional climates by forming  
76 the only barrier to atmospheric circulation in the Neotropics<sup>23,24</sup>. The rise of the Andes  
77 led to the formation of island-like habitats and of local microclimates and soil  
78 conditions that eventually fostered species diversification<sup>14,25,26</sup>. At the same time, the  
79 Andes provided physical and/or ecological barriers to species dispersal and migration.  
80 For instance, the efficiency of the Northern Andes as migration barrier is shown for  
81 Andean centred woody species of *Crematosperma*, *Klarobelia*, *Malmea*, and  
82 *Mosannonna* (Annonaceae<sup>27</sup>). Propagules are dispersed by animals in these lineages<sup>28</sup>,  
83 and none of their constituent species occur in both east and west of the Andes mountain  
84 range<sup>27</sup>.

85         Recent phylogenetic studies provide solid evidence for the important role of  
86 Andean uplift in diversification of highland-dwelling plant groups (e.g., *Lupinus*<sup>14</sup>;  
87 *Bartsia*<sup>29</sup>; centropogonid Campanulaceae<sup>9</sup>). However, the impact of such orographic  
88 processes for the lowland flora is still poorly understood<sup>4,6,30</sup>. Thus, the question  
89 remains whether Andean uplift has indeed been an abiotic barrier to migration for  
90 epiphytic lineages such as lowland orchids and bromeliads, both being important  
91 components of Neotropical forests.

92         Epiphytic diversity is dramatically greater in the Neotropics than in any other  
93 tropical region around the world<sup>31,32</sup>, being twice as high than, for instance, in  
94 Australasia<sup>33–36</sup>. Several traits shared by Neotropical epiphytic taxa, and related to their  
95 reproductive biology, may explain such overwhelming differences in diversity. One of  
96 the most prominent shared traits is the lightness and the very small size of the  
97 propagules, occasionally with highly elaborated surfaces (e.g., bromeliads, ferns,  
98 orchids, *Pinguicula*<sup>33</sup>). The potential of dust-like seeds for longer distance dispersals by  
99 wind might be much greater compared to other plants with propagules locally dispersed

100 by animals (e.g., Araceae<sup>37</sup>). Nonetheless, it remains largely unknown whether lowland  
101 epiphyte lineages have been able to disperse across geological barriers such as the  
102 Andes. Well-sampled phylogenies for epiphyte clades have been lacking to address this  
103 issue.

104 Several wind-dispersed plant lineages (e.g., *Begonia*<sup>11</sup>; bromeliads<sup>38</sup>) span across  
105 the Neotropical region, many of which are restricted to lowland elevations. One  
106 example is the orchid tribe Cymbidieae comprising *ca* 3900 species that are mostly  
107 distributed in the Neotropics (but with few representatives in the Old World Tropics<sup>39</sup>).  
108 To Neotropical Cymbidieae belong the swan orchids (*Cycnoches*) that are known for the  
109 striking sexual dimorphisms<sup>40</sup> and pollination syndrome<sup>41</sup>. Molecular phylogenetics and  
110 morphological studies conducted to date confirm the inclusion of *Cycnoches* within  
111 Catasetinae<sup>42-44</sup> and its sister group relationship to *Mormodes*<sup>40,45,46</sup>.

112 *Cycnoches* encompasses 34 species of epiphytes<sup>47</sup> that are distributed from  
113 Southern Mexico to Central Brazil and Bolivia. Its species are best represented in the  
114 Amazonian forests of Brazil, Ecuador, and Peru, but also in the Llanos and Caribbean  
115 regions of Colombia and Venezuela<sup>47,48</sup>. They commonly inhabit lowland tropical wet  
116 forests, ranging from 0 to 800 m. *Cycnoches* species are pollinated by male euglossine  
117 bees, which collect volatile compounds produced by flowers but also from other sources  
118 (e.g., rotten wood, faeces<sup>41</sup>). They have rather a restricted geographical range, and most  
119 of them are distributed in single biogeographical area. Nevertheless, one species (*C.*  
120 *chlorochilon*) is distributed in both sides of the Northern Andes<sup>47</sup>.

121 Because of the striking sexual system they have evolved<sup>40</sup>, swan orchids have  
122 long attracted the attention of several prominent botanists including<sup>49</sup>. Despite this long  
123 interest, previous phylogenetic studies have only been included up to three species of  
124 *Cycnoches* probably because of their scarceness both in the wild and in herbarium

125 collections<sup>42,43,45,46,50</sup>. Moreover, the lack of a solid and well-sampled phylogeny of  
126 *Cycnoches* has precluded addressing specific questions concerning the role of Andean  
127 uplift in their biogeographical history. The narrow geographical distribution of almost  
128 all extant *Cycnoches* species and their restricted habitat preference given (i.e., lowland  
129 wet forests, see above), we expect the swan orchids diversification to be strongly  
130 influenced by the Andean uplift. In particular, we hypothesize that Andean uplift was an  
131 impassable, isolative, barrier for *Cycnoches*, as already reported for other plant lineages.  
132 To test this hypothesis, we generated a strongly supported 5-loci phylogeny, sampling  
133 23 out of 34 accepted *Cycnoches* species and comprising its known diversity and  
134 distribution, and performed models of biogeographical analyses.

135

## 136 **Results**

### 137 *Phylogeny of Cycnoches*

138 Our phylogeny comprised 23 out of 34 accepted species of *Cycnoches*. Table S5  
139 provides detailed alignment descriptions. The concatenated ‘nuc’ alignment was 2395  
140 bp in length and included 310 parsimony informative sites, and the concatenated ‘cp’  
141 alignment was 2419 bp and comprised 171 parsimony informative positions.  
142 Independently derived ‘nuc’ and ‘cp’ phylogenies revealed topologies with conflicting  
143 and highly supported phylogenetic placements. PACo analysis revealed 22 potential  
144 outlier OTUs (see below; Figs S1–S2) belonging to *Cycnoches* (majority of 19),  
145 *Dressleria*, and *Mormodes*. After inspection of the potentially conflicting OTUs  
146 placement in ‘nuc’ and ‘cp’ phylogenies (Fig. S2), 20 outliers were confirmed as  
147 conflicting terminals. Thus, only two terminals (i.e., *Dressleria severiniana* and one  
148 representative of *C. lehmannii*) were misclassified by PACo as conflicting (see  
149 Appendix S1 for a detailed explanation on outlier handling).

150           Within *Cycnoches*, the ‘nuc’ phylogeny recovered three maximally supported  
151 clades (A, B, C; Fig. 1). Clade A included all sequenced accessions of *Cycnoches haagii*  
152 and was recovered as sister group of the remaining species of *Cycnoches* comprising  
153 clades B and C. By contrast, the ‘cp’ phylogeny showed two main maximally supported  
154 clades (namely I and II), each including a set of intermingled species from clades A, B,  
155 and C. The best ML tree inferred from non-conflicting, concatenated ‘nuc’ and ‘cp’  
156 datasets showing the internal phylogenetic relationships of *Cycnoches* is presented in  
157 Figure 2. Virtually, all internal nodes of the backbone phylogeny were highly, if not  
158 maximally supported by MLBS and PP values. *Cycnoches* segregated into three main  
159 lineages (clades A, B and C). Clade A (i.e., all specimens of *C. haagii*) was sister group  
160 of the remaining species of *Cycnoches* clustering in clades B and C.

161

#### 162 *Molecular dating of Cycnoches*

163           Comparison of marginal likelihood estimates (MLE) of tree priors and clock  
164 models revealed that an uncorrelated molecular clock combined to a birth-death tree  
165 prior with incomplete sampling best fitted our data (MLE of  $-14244.47$ ; Table 1).  
166 Nevertheless, Bayes factors (BF) clearly rejected the strict clock models (BF = 72, 45,  
167 and 40 for all tree priors), but did not provide strong evidence to support an incomplete  
168 sampling birth-death model vs a standard birth-death model (BF=1.08; Table 1).  
169 Analysis of the log file produced by dating analyses under the relaxed clock and tree  
170 models are also shown in Table 1. Overall, they yielded CV values between 0.35 and  
171 0.42 (indicating there was among branch rate heterogeneity, which argued for the use of  
172 a relaxed molecular clock). Therefore, results obtained from a dated phylogeny with  
173 relaxed molecular clock and birth-death standard speciation model (Table 1) are  
174 presented only (Figs 3, S5).

175 A chronogram showing absolute ages estimated under a relaxed clock is  
176 presented in Figure 3 (see also Fig. S5 for the 95% confidence intervals) and shows that  
177 *Cynoches* and *Mormodes* shared a common ancestor during the beginning of the late  
178 Miocene (9.1 Mya  $\pm$ 3). Diversification of *Cynoches* took place around 5 Mya  $\pm$ 2 at end  
179 of the late Miocene. The split between *Cynoches* clades B and C occurred during late  
180 Pliocene (3 Mya  $\pm$ 2), whereas both clades were estimated to be of Pleistocene ages (1.2  
181 and 1.6 Mya  $\pm$  1, respectively).

182

### 183 *Ancestral area estimations*

184 Table 2 provides ML statistics for the biogeographical models as inferred in  
185 BioGeoBEARS. The best fitting parametric model was the BAYAREA star, including  
186 the founder-event speciation. This model revealed a geographical origin in Amazonia as  
187 the most likely ancestral area of *Cynoches* (Figs 3, S6). The MRCA of clades B and C  
188 was reconstructed to have inhabited in Amazonia region. The MRCA of clade C  
189 occurred in Central America, whereas the MRCA of clade B inhabited in Amazonia  
190 region.

191 Three independent trans-Andean migration events between Amazonia and  
192 Central America could be identified. The first migration from Amazonia to Central  
193 America took place towards the late Pliocene ( $\pm$ 1 Mya), after the divergence of MRCAs  
194 of clades B and C. A second migration from Central America to Amazonia took place  
195 around mid-Pleistocene ( $\pm$ 1 Mya) by the MRCA of *C. maculatum*, *C. manoelae*, *C.*  
196 *peruvianum*, *C. quatuorcristis*, and *C. suarezii*. Last biotical exchange from Amazonia  
197 to Central America was dated to late Pleistocene ( $\pm$ 0.5 Mya) with the MRCA of *C.*  
198 *chlorchilon*, *C. ventricosum*, and *C. warzsewiczii*.

199



200 **Discussion**

201 *Influence of Andean orogeny on the biogeography of a Neotropical epiphyte group*

202 Our study provides a solid phylogenetic framework, divergence times, and  
203 ancestral areas estimation for *Cycnoches*. Central America has been considered the most  
204 likely region of *Cycnoches* origin, probably because of its locally elevated species  
205 richness as compared to other areas in the Neotropics (Romero & Gerlach, *in press*).  
206 However, this evolutionary scenario is rejected by our analyses, which instead support a  
207 South American origin of *Cycnoches* in the late Miocene (ca. 5 Mya  $\pm$ 2; Fig. 3, Fig.  
208 S6). The ancestral area estimated at *Cycnoches* MRCA largely reflects the current  
209 distribution of early diverging lineages such as *C. haagii*, a species today distributed in  
210 Amazonia and the Guiana Shield. Thus, the early diversification of *Cycnoches* has taken  
211 place well after the most intense mountain building events of the Northern and Central  
212 Andes ca. 12 and 10 Mya, respectively<sup>7,52–54</sup>.

213 Our results indicate a less important role of the Andes as a biogeographic barrier  
214 for the diversification of *Cycnoches*. Two migrations from Amazonia to Central  
215 America and one reverse colonisation event back imply vigorous ancient dispersals  
216 across the Andes during last 5 million years (Figs 3). During the early Pliocene (i.e., the  
217 period when *Cycnoches* has started to diversify), the Northern Andes of Colombia and  
218 Venezuela have already reached elevations up to at least 3000 m (Hoorn *et al.*, 2010).  
219 Moreover, three migrations from Amazonia to Central America and back, respectively,  
220 took place ~2 Mya, when the Northern and Central Andes already peaked at a mean  
221 elevation of 4000 m (see mean Andean elevation displayed in the inset of Fig. 3).

222 Similar trans-Andean migrations are reported for bromeliads and ferns. In  
223 Bromeliaceae (subfamily Bromelioideae), direct migrations from the Brazilian Shield  
224 towards Central America took place around 7 Mya<sup>38</sup>, a period where Northern Andes

225 reached a palaeoelevation of  $\sim 2000$  m<sup>7</sup>. Furthermore, biotical exchanges between South  
226 and Central America have also been reported in the fern complex *Jamesonia-Eriosorus*  
227 (Pteridaceae)<sup>30</sup>. Here, migrants from the Brazilian coast colonised and further  
228 established in Central Andes, and from there subsequently migrated towards Central  
229 America during the late Pleistocene<sup>55</sup>.

230         Impermeability of the Andes as a barrier for reproductive isolation does not  
231 appear as important for Neotropical epiphyte lineages such as *Cycnoches*. Our results  
232 also point to a rapid colonization of the mainland Neotropics (i.e., colonization of  
233 Central America, Amazonia, and Choco in  $\sim 5$  million yr.). Such biotic invasion may be  
234 related to the biology of the group having anemochorous seed dispersal and an epiphytic  
235 habit. Most orchid seeds are characterized by their minute size and reduced weight, as  
236 well as by their elaborated seed coats<sup>56,57</sup>. These traits allow them to easily remain  
237 airborne for extended periods of time and to travel over long distances<sup>57</sup>. *Cycnoches*  
238 species might have good dispersal potential as well because of their seeds, which are  
239 between 100–300  $\mu\text{m}$  long, 50–60  $\mu\text{m}$  wide, and about 3.6  $\mu\text{g}$  weight<sup>56,58</sup>.

240         Empirical evidence strongly supports short mean dispersal distances (e.g., 4–5  
241 m) of seeds from terrestrial orchids such as *Orchis purpurea*<sup>59</sup>, yet there are no  
242 experimental studies supporting putatively longer dispersal of epiphytic orchid seeds.  
243 Nevertheless, disjunctive distributions of several orchid taxa occurring, for instance, in  
244 remote islands (e.g., *Anacamptis pyramidalis* growing in Aldabra island and  
245 Madagascar<sup>60</sup>) require dispersals over longer ranges as explanation. Authors have  
246 already reported disjunctive distributions of several orchid species resulting from  
247 putative long-distance dispersals<sup>61,62</sup>. However, to the best of our knowledge, no study  
248 has yet reported ancient orchid long-distance dispersal across a geographical barrier  
249 such as the Andes.

250

251 *Phylogenetic conflict between nuclear and plastid phylogenies in Cycnoches*

252 Our study brings important insights for the species relationships within  
253 *Cycnoches*. Previous phylogenetic studies about Catasetinae have included not more  
254 than three species of *Cycnoches*<sup>42,43,45,46,50</sup>, hence keeping internal relationships (and  
255 corresponding conflicts, see bellow) of the lineages unresolved. Serious phylogenetic  
256 incongruence between ‘nuc’ and ‘cp’ tree topologies of Catasetinae has been firstly  
257 identified by<sup>63</sup>, but a discussion about the respective plausibility of the trees has been  
258 remained undone.

259 All major clades in our ‘nuc’ phylogeny are consistent with morphological  
260 concepts of *Cycnoches* (Fig. 1a). *Cycnoches hagii* (Clade A) differs from other  
261 *Cycnoches* species by the fleshy oblong, curved pair set of calli located towards the base  
262 of the labellum. Clade B includes species with conspicuously large male flowers and an  
263 entire to 4-lobed labellum blade. Clade C comprises species with proportionately small  
264 male flowers and labella with 8–10 marginal projections<sup>48</sup>. The consistence between  
265 ‘nuc’ molecules and morphology is challenged by an apparent correlation between the  
266 ‘cp’ molecular tree and the distributions of particular lineages (Fig. 1b): Clade I  
267 comprises species occurring mostly in Amazonia, Caribbean-Llanos, and Guyana shield  
268 regions (except *C. warzsewiczii* present in Panama and Costa Rica: Fig. S4). Clade II, in  
269 turn, includes species exclusively distributed in Central America and Choco regions.

270 Topological incongruence between phylogenies derived from different DNA  
271 data partitions is a widespread phenomenon in phylogenetic inferences<sup>64,65</sup>. Examples  
272 from angiosperms (e.g., Araceae<sup>37</sup>, Asteraceae<sup>66</sup>, Saxifragaceae<sup>67</sup>) have long revealed  
273 similar conflicting patterns, in which the ‘nuc’ phylogeny is in accordance with  
274 morphology, whereas the ‘cp’ relationships correlate to geographical distributions. For

275 the particular case of *Cycnoches*, hybridization might have explanatory power for the  
276 nuclear-plastid conflict observed in the clade. Euglossine-bee-pollinated orchids such as  
277 *Cycnoches* produce a blend of volatile compounds, which attracts male Euglossine bees,  
278 and pollination takes place while bees collect such compounds produced by specialized  
279 tissues in the flower<sup>68</sup>. Species-specific production of floral blends and therefore  
280 attraction of a unique set of pollinator(s) has been accounted as an isolative reproductive  
281 barrier in Euglossine bee pollinated orchids<sup>41,69</sup>. Nevertheless, intra-specific variation of  
282 fragrances produced by the flower has been reported in several orchid lineages such as  
283 *Stanhopea*<sup>70</sup> and even *Cycnoches*<sup>71</sup>. Fragrance variation may result on attraction of a set  
284 of pollinators that are shared by species co-occurring in the same biogeographical  
285 region (e.g. *C. diana*, *C. guttulatum*, and *C. pachydactylon*<sup>71</sup>; see also Fig. S4) with  
286 similar composition of the fragrance profile, providing an opportunity to hybridization  
287 to occur. Little is known about pollinators of *Cycnoches*, but our own observations of  
288 pollinator sharing between species and presence of polymorphic species may indicate  
289 past hybridization processes.

290

## 291 **Conclusion**

292 Based on a solid, comprehensively sampled phylogeny we provide  
293 macroevolutionary evidence for a South American origin of *Cycnoches*. Our  
294 biogeographical analysis indicates colonization of Central America via a direct  
295 migration from the Amazonian basin. More importantly, the analyses support three  
296 recent trans-Andean, bidirectional migration processes between Central America and  
297 Amazonia, which is indicative for a minor effect of the Andean barrier on swan orchids  
298 migration. Consequently, our study enlightens the limited role of Andean mountain

299 building on the range evolution and diversification of lowland Neotropical epiphytic  
300 lineages.

301

## 302 **Material and methods**

### 303 *Taxon sampling, DNA sequencing and phylogenetic analyses*

304 Species names, geographical origins, voucher specimens, and GenBank  
305 accession numbers of sequences included in phylogenetic analyses are provided in  
306 Table S1. Our study builds-up upon the DNA data matrices generated by<sup>40,46,63</sup>.  
307 Genomic DNA was extracted from herbarium and fresh leaf material with the  
308 NucleoSpin® plant kit (Macherey-Nagel; Düren, Germany). We amplified and  
309 sequenced nuclear (consistently referred as ‘nuc’ henceforth) ribosomal external and  
310 internal transcribed spacers (ETS and ITS, respectively), and a fragment of the *Xdh*  
311 gene. We also sequenced a ~1500 bp fragment of the plastid (referred to as ‘cp’) gene  
312 *ycf1*, as well as the *trnS–trnG* intergenic spacer. Amplification and sequencing settings,  
313 as well as sequencing primers used for ITS, ETS, *Xdh*, *trnS–trnG*, and *ycf1* are the same  
314 as in<sup>63,72</sup> (Table S2). In this study, 84 sequences were newly generated (Table S1).

315 Loci were aligned separately using MAFFT 7.1<sup>73</sup>. For ‘nuc’ ribosomal RNA loci  
316 and ‘cp’ *trnS–trnG* spacer, secondary structure of molecules was taken into account  
317 (i.e., the -qINSi option). Congruence between ‘nuc’ and ‘cp’ datasets was assessed  
318 following Pérez-Escobar et al.<sup>63</sup> and using PACo<sup>74</sup>. The procedure is available as a  
319 pipeline (<http://www.uv.es/cophylpaco/>) and was also employed to identify operational  
320 terminal units (OTUs) from the ‘cp’ dataset that conflicting with the ‘nuc’ dataset  
321 (potential outliers detected by PACo are shown in Figs S1–S2). A detailed explanation  
322 on PACo and a rationale on outlier handling is provided Extended Materials and  
323 Methods of Appendix S1.

324 Phylogenetic analyses of separate and concatenated loci were carried out under  
325 maximum likelihood (ML) and Bayesian inference (BI). The best-fitting evolutionary  
326 models for ML and Bayesian analyses (for each data partition) were selected using  
327 jModelTest v.2.1.6<sup>75</sup>, relying on a Likelihood Ratio Test (LRT) and the Akaike  
328 information criterion (AIC) (Table S3). Phylogenetic inference relied on the ML  
329 approach implemented in RAXML-HPC v.8.2.4<sup>76</sup> and BI as implemented in  
330 MRBAYES v.3.2.2<sup>77</sup> and were carried out on the CIPRES Science Gateway computing  
331 facility<sup>78</sup>. Bayesian inferences were performed with two independent runs, each with  
332 four Markov chains Monte Carlo (MCMC) running for 30 million generations each, and  
333 sampled every 1000<sup>th</sup> generation (all other prior settings by default). Log files derived  
334 from MRBAYES were examined, and the convergence of MCMC was assessed using  
335 TRACER (available at: <http://tree.bio.ed.ac.uk/software/tracer/>). Node support values  
336 were assessed for both the ML tree using Maximum Likelihood Bootstrap Support  
337 (MLBS) and the consensus Bayesian tree using posterior probabilities (PP).

338

### 339 *Molecular clock dating*

340 A few orchid macrofossils are available for Orchidaceae<sup>79,80</sup>, but these are  
341 assigned to lineages very distantly related to our groups of interest. Using distant  
342 outgroups to calibrate our *Cynoches* phylogeny would have created extensive sampling  
343 heterogeneities, which can result in spurious results<sup>81</sup>. Thus, we had to rely on  
344 secondary calibrations. In order to obtain the best secondary calibration points possible,  
345 we first generated an Orchidaceae-wide fossil-calibrated phylogenies, sampling 316  
346 orchid species sampled as evenly as possible along the tree. Loci, number of sequences  
347 and settings for absolute age estimation of the Orchidaceae-wide fossil calibrate  
348 phylogeny are provided in the Extended Materials and Methods of Appendix S1. The

349 ages obtained were very similar to recent orchid dating studies<sup>82,83</sup> and the dated  
350 phylogeny is shown in Figure S3.

351 We selected two secondary calibrations for the dating of *Cycnoches*: (i) the  
352 crown group of Catasetinae was set to 19.8 Mya with a standard deviation of 4 to reflect  
353 the 95% CI, and (ii) and the root of the *Cycnoches* tree (i.e., MRCA of *Cyrtopodium* +  
354 Catasetinae) was set to 27.1 Mya with a standard deviation of 6. To explore the clock-  
355 likeness of the data, we used both strict clock and uncorrelated lognormal clock models,  
356 and compared different tree priors (pure-birth, standard birth-death, and incomplete  
357 sampling birth-death). For strict molecular clock calibration, we placed a single  
358 constraint only at the tree root (27.1 Mya with a standard deviation of 6) using a normal  
359 distribution. The best-fitting tree speciation model was selected using Bayes factors  
360 calculated from marginal likelihoods computed for every model using the stepping-  
361 stone sampling<sup>84</sup> (Table 1). For each clock model, we ran two MCMC analyses with 20  
362 million generations each, sampled every 1000<sup>th</sup> generation. For the relaxed molecular  
363 clock analyses, we estimated the coefficient of variation (CV) to inform us on the rate  
364 heterogeneity among branches (CV approaching 0 indicates that a strict clock model  
365 cannot be rejected). Parameter convergence was confirmed using TRACER  
366 (<http://tree.bio.ed.ac.uk/software/tracer/>). All dating analyses were performed at the  
367 CIPRES Science Gateway computing facility<sup>78</sup>.

368

### 369 *Ancestral area estimations*

370 Species ranges of *Cycnoches* of were coded from the collection site and type  
371 locality of the material sequenced, which reflect the distribution ranges for every taxa  
372 included in our phylogeny (except by *C. chlorochilon* and *C. pentadactylon*, which also  
373 occur in Central America and Southeastern South America, respectively; see below).

374 Distribution data of *Cycnoches* and outgroup taxa was obtained from own field  
375 observations, literature<sup>85,86</sup> and from herbarium specimens (Herbaria AMES, COL, F,  
376 M, MO, SEL, US); this information was employed to code outgroup distribution ranges.  
377 Biogeographical areas were derived from distribution maps of the orchids under  
378 investigation (Fig. S4) as well as species distributions observed in other plant lineages  
379 (e.g., Rubiaceae<sup>6</sup>; Bromeliaceae<sup>38</sup>). We coded for eight biogeographical areas using the  
380 R-package ‘SpeciesGeocodeR’<sup>87</sup>: (1) Central America comprising southern Mexico  
381 through Panama; (2) Caribbean-Llanos comprising the coastal northernmost areas and  
382 plains of Colombia and Venezuela<sup>88</sup>; (3) Guiana Shield encompasses areas above 800 m  
383 in Colombia, Venezuela, Brazil, Guyana, Suriname, and French Guiana; (4) Amazonia  
384 encompassing lowlands and pre-montane forest below 800 m in Colombia, Ecuador,  
385 Peru, Brazil, Venezuela, Guyana, Suriname, and French Guiana<sup>6</sup>; (5) Chocó comprising  
386 lowlands below 500 m of the western Andes in Colombia and Ecuador; (6) Northern  
387 Andes including elevated areas above 800 m from Southernmost Peru to Northern  
388 Colombia and Northeast Venezuela; (7) Central Andes comprising areas above 800 m  
389 in Northern Peru to Northern Chile and Northeast Argentina; (8) South-eastern South  
390 America encompassing part of the Brazilian shield, the Atlantic forest, South-eastern  
391 Bolivia, Paraguay, Uruguay, and Northern Argentina. A map with the eight  
392 biogeographical areas, number of species for each area, and the corresponding  
393 distribution records of *Cycnoches* plus outgroups are provided in Figure S4.

394 To infer ancestral areas in *Cycnoches*, we used the R-package ‘BioGeoBEARS’  
395 (Biogeography with Bayesian and Likelihood Evolutionary Analysis in R script<sup>89</sup>).  
396 Using BioGeoBEARS, we tested the fit of six biogeographic models with and without  
397 founder-event speciation (or jump speciation), altogether testing the role and  
398 contribution of evolutionary processes that were taken into account to explain today’s



399 observed distributions (i.e., range expansions, local extinctions, founder-event  
400 speciation, vicariance, and speciation despite sympatry) in a joint statistical framework.  
401 It is therefore capable of model testing and of determining, which process fits better the  
402 geographical and phylogenetic data for any particular clade.

403 **References**

- 404 1. Humboldt, A. *Voyage aux regions equinoxiales du Nouveau Continent*. (N.  
405 Mazé, 1820).
- 406 2. Darwin, C. *Geological observations of South America*. (Smith, Elder and CO.,  
407 1846).
- 408 3. Jaramillo, C., Rueda, M. J. & Mora, G. Cenozoic plant diversity in the  
409 Neotropics. *Science (80-. )*. **311**, 1893–1896 (2006).
- 410 4. Antonelli, A. & Sanmartín, I. Why are there so many plant species in the  
411 Neotropics? *Taxon* **60**, 403–414 (2011).
- 412 5. Myers, N., Mittermeier, R. A., Mittermeier, C. G., Fonseca, G. A. B. & Kent, J.  
413 Biodiversity hotspots for conservation priorities. *Nature* **403**, 853–858 (2000).
- 414 6. Antonelli, A., Nylander, J. A. A., Persson, C. & Sanmartín, I. Tracing the impact  
415 of the Andean uplift on Neotropical plant evolution. *Proc. Natl. Acad. Sci. U. S.*  
416 *A.* **106**, 9749–9754 (2009).
- 417 7. Hoorn, C. *et al.* Amazonia Through Time□: Andean uplift, climate change,  
418 landscape evolution, and biodiversity. *Science (80-. )*. **330**, 927–931 (2010).
- 419 8. Bacon, C. D. *et al.* Biological evidence supports an early and complex emergence  
420 of the Isthmus of Panama. *Proc. Natl. Acad. Sci.* **112**, 6110–6115 (2015).
- 421 9. Lagomarsino, L., Condamine, F. L., Antonelli, A., Mulch, A. & Davis, C. C. The  
422 abiotic and biotic drivers of rapid diversification in Andean bellflowers  
423 (Campanulaceae). *New Phytol.* **210**, 1430–1432 (2016).
- 424 10. Hughes, C. E., Pennington, R. T. & Antonelli, A. Neotropical plant evolution:  
425 assembling the big picture. *Bot. J. Linn. Soc.* **171**, 1–18 (2013).
- 426 11. Moonlight, P. W. *et al.* Continental-scale diversification patterns in a  
427 megadiverse genus: the biogeography of Neotropical *Begonia*. *J. Biogeogr.* **42**,

- 428 1–13 (2015).
- 429 12. Pennington, R. T. *et al.* Contrasting plant diversification histories within the  
430 Andean biodiversity hotspot. *Proc. Natl. Acad. Sci.* **107**, 13783–13787 (2010).
- 431 13. Luebert, F., Hilger, H. H. & Weigend, M. Diversification in the Andes: age and  
432 origins of South American Heliotropium lineages (Heliotropiaceae, Boraginales).  
433 *Mol. Phylogenet. Evol.* **61**, 90–102 (2011).
- 434 14. Hughes, C. & Eastwood, R. Island radiation on a continental scale: exceptional  
435 rates of plant diversification after uplift of the Andes. *Proc. Natl. Acad. Sci. U. S.*  
436 *A.* **103**, 10334–10339 (2006).
- 437 15. Nevado, B., Atchison, G. W., Hughes, C. E. & Filatov, D. A. Widespread  
438 adaptive evolution during repeated evolutionary radiations in New World lupins.  
439 *Nat. Commun.* **7**, 1–9 (2016).
- 440 16. Bacon, C. D., Mora, A., Wagner, W. L. & Jaramillo, C. A. Testing geological  
441 models of evolution of the Isthmus of Panama in a phylogenetic framework. *Bot.*  
442 *J. Linn. Soc.* **171**, 287–300 (2013).
- 443 17. Luebert, F. & Weigend, M. Phylogenetic insights into Andean plant  
444 diversification. **2**, 1–17 (2014).
- 445 18. van der Hammen, T. The Pleistocene changes of vegetation and climate in  
446 Tropical South America. *J. Biogeogr.* **1**, 3–26 (1974).
- 447 19. Martínez, C., Madriñán, S., Zavada, M. & Jaramillo, C. A. Tracing the fossil  
448 pollen record of Hedyosmum (Chloranthaceae), an old lineage with recent  
449 Neotropical diversification. *Grana* **52**, 161–180 (2013).
- 450 20. Ghosh, P., Garzzone, C. N. & Eiler, J. M. Rapid uplift of the Altiplano revealed  
451 through  $^{13}\text{C}$ - $^{18}\text{O}$  bonds in Paleosol carbonates. *Science (80-. )*. **311**, 511–515  
452 (2006).

- 453 21. Kar, N. *et al.* Rapid regional surface uplift of the northern Altiplano plateau  
454 revealed by multiproxy paleoclimate reconstruction. *Earth Planet. Sci. Lett.* **447**,  
455 33–47 (2016).
- 456 22. Hoorn, C., Guerrero, J., Sarmiento, G. A. & Lorente, M. A. Andean tectonics as a  
457 cause for changing drainage patterns in Miocene northern South America.  
458 *Geology* **23**, 237–240 (1995).
- 459 23. Gregory-Wodzicki, K. M. Uplift history of the Central and Northern Andes: a  
460 review. *Geol. Soc. Am. Bull.* **112**, 1091–1105 (2000).
- 461 24. Armijo, R., Lacassin, R., Coudurier-Curveur, A. & Carrizo, D. Coupled tectonic  
462 evolution of Andean orogeny and global climate. *Earth Sci. Rev.* **143**, 1–35  
463 (2015).
- 464 25. Gentry, A. H. Neotropical floristic diversity: phytogeographical connections  
465 between Central and South America, Pleistocene climatic fluctuations, or an  
466 accident of the Andean orogeny? *Ann. Missouri Bot. Gard.* **69**, 557–593 (1982).
- 467 26. Richter, M., Diertl, K., Emck, P., Peters, T. & Beck, E. Reasons for an  
468 outstanding plant diversity in the tropical Andes of Southern Ecuador. *Landsc.*  
469 *Online* **12**, 1–35 (2009).
- 470 27. Pirie, M. D., Chatrou, L. W., Mols, J. B., Erkens, R. H. J. & Oosterhof, J.  
471 ‘Andean-centred’ genera in the short-branch clade of Annonaceae: Testing  
472 biogeographical hypotheses using phylogeny reconstruction and molecular  
473 dating. *J. Biogeogr.* **33**, 31–46 (2006).
- 474 28. Janzen, D. H. & Martin, P. S. Neotropical anachronisms: the fruits the  
475 gomphotheres ate. *Science (80-. )*. **215**, 19–27 (1982).
- 476 29. Uribe-Convers, S. & Tank, D. C. Shifts in diversification rates linked to  
477 biogeographic movement into new areas: An example of a recent radiation in the

- 478           Andes. *Am. J. Bot.* **102**, 1–16 (2015).
- 479   30.   Sánchez-Baracaldo, P. Phylogenetics and biogeography of the Neotropical fern  
480           genera *Jamesonia* and *Eriosorus* (Pteridaceae). *Am. J. Bot.* **91**, 274–284 (2004).
- 481   31.   Kreft, H., Koster, N., Kuper, W., Nieder, J. & Barthlott, W. Diversity and  
482           biogeography of vascular epiphytes in Western Amazonia, Yasuni, Ecuador. *J.*  
483           *Biogeogr.* **31**, 1463–1476 (2004).
- 484   32.   Krömer, T., Kessler, M., Gradstein, S. R. & Acebey, A. Diversity patterns of  
485           vascular epiphytes along an elevational gradient in the Andes. *J. Biogeogr.* **32**,  
486           1799–1809 (2005).
- 487   33.   Gentry, A. H. & Dodson, C. H. Diversity and biogeography of Neotropical  
488           vascular epiphytes. *Ann. Missouri Bot. Gard.* **74**, 205–233 (1987).
- 489   34.   Mutke, J. & Barthlott, W. Patterns of vascular plant diversity at continental to  
490           global scales. *Biol. Skr.* **55**, 521–531 (2005).
- 491   35.   Kier, G. *et al.* Global patterns of plant diversity and floristic knowledge. *J.*  
492           *Biogeogr.* **32**, 1107–1116 (2005).
- 493   36.   Zotz, G. The systematic distribution of vascular epiphytes—a critical update. *Bot.*  
494           *J. Linn. Soc.* **171**, 453–481 (2013).
- 495   37.   Nauheimer, L., Boyce, P. C. & Renner, S. S. Giant taro and its relatives: a  
496           phylogeny of the large genus *Alocasia* (Araceae) sheds light on Miocene floristic  
497           exchange in the Malesian region. *Mol. Phylogenet. Evol.* **63**, 43–51 (2012).
- 498   38.   Givnish, T. J. *et al.* Phylogeny, adaptive radiation, and historical biogeography in  
499           Bromeliaceae: Insights from an eight-locus plastid phylogeny. *Am. J. Bot.* **98**,  
500           872–895 (2011).
- 501   39.   Pridgeon, A. M., Cribb, P. J., Chase, M. W. & Rasmussen, F. N. *Genera*  
502           *Orchidacearum: Vol. 5. Epidendroideae (part two)*. (Oxford University Press,

- 503           2009).
- 504   40.   Pérez-Escobar, O. A., Gottschling, M., Whitten, W. M., Salazar, G. & Gerlach,  
505           G. Sex and the Catasetinae (Darwin's favourite orchids). *Mol. Phylogenet. Evol.*  
506           **97**, 1–10 (2016).
- 507   41.   Ramirez, S. R. *et al.* Asynchronous Diversification in a Specialized Plant-  
508           Pollinator Mutualism. *Science (80-. )*. **333**, 1742–1746 (2011).
- 509   42.   Chase, M. W. & Pippen, J. S. Seed morphology and phylogeny in Subtribe  
510           Catasetinae (Orchidaceae). *Lindleyana* **5**, 126–133 (1990).
- 511   43.   Romero, G. A. Phylogenetic relationships in Subtribe Catasetinae (Orchidaceae,  
512           Cymbidieae). *Lindleyana* **5**, 160–181 (1990).
- 513   44.   Stern, W. & Judd, W. Comparative anatomy and systematics of Catasetinae  
514           (Orchidaceae). *Bot. J. Linn. Soc.* **136**, 153–178 (2001).
- 515   45.   Batista, J. N. *et al.* Molecular phylogenetics of Neotropical Cyanaeorchis  
516           (Cymbidieae, Epidendroideae, Orchidaceae): Geographical rather than  
517           morphological similarities plus a new specie. *Phytotaxa* **156**, 251–272 (2014).
- 518   46.   Whitten, W. M., Neubig, K. M. & Williams, N. H. Generic and subtribal  
519           relationships in neotropical Cymbidieae (Orchidaceae) based on matK/ycf1  
520           plastid data. *Lankesteriana* **13**, 375–392 (2014).
- 521   47.   Carr, G. F. J. The genus *Cycnoches*: species and hybrids. *Orchid Rev.* 1–31  
522           (2012).
- 523   48.   Gerlach, G. & Pérez-Escobar, O. A. Looking for missins swans: Phylogenetics of  
524           *Cycnoches*. *Orchids* **83**, 434–437 (2014).
- 525   49.   Darwin, C. *On the various contrivances by which british and foreign orchids are*  
526           *fertilised by insects*. (Appleton and CO., 1877).
- 527   50.   Pridgeon, A. M. & Chase, M. W. in *Proceeding of the 15th World Orchid*

- 528            *Conference* 275–281 (1998).
- 529    51.    Romero, G. A. & Gerlach, G. in *Flora Mesoamericana* (Missouri Botanical  
530            Garden Press).
- 531    52.    Garzione, C. N., Molnar, P., Libarkin, J. C. & Macfadden, B. J. Rapid late  
532            Miocene rise of the Bolivian Altiplano: evidence for removal of mantle  
533            lithosphere. *Earth Planet. Sci. Lett.* **241**, 543–556 (2006).
- 534    53.    Garzione, C. N. *et al.* Rise of the Andes. *Nature* **320**, 1304–1307 (2008).
- 535    54.    Garzione, C. N. *et al.* Clumped isotope evidence for diachronous surface cooling  
536            of the Altiplano and pulsed surface uplift of the Central Andes. *Earth Planet. Sci.*  
537            *Lett.* **393**, 173–181 (2014).
- 538    55.    Sánchez-Baracaldo, P. & Thomas, G. H. Adaptation and convergent evolution  
539            within the *Jamesonia-Eriosorus* complex in high-elevation biodiverse andean  
540            hotspots. *PLoS One* **9**, e110618 (2014).
- 541    56.    Arditti, J. & Ghani, A. K. A. Numerical and physical properties of orchid seeds  
542            and their biological implications. *New Phytol.* **145**, 367–421 (2000).
- 543    57.    Jersáková, J. & Malinová, T. Spatial aspects of seed dispersal and seedling  
544            recruitment in orchids. *New Phytol.* **176**, 237–241 (2004).
- 545    58.    Barthlott, W., Große-Veldmann, B. & Korotkova, N. *Orchid seed diversity: a*  
546            *scanning electron microscopy survey*. (Botanic Garden and Botanical Museum  
547            Berlin, 2014).
- 548    59.    Jacquemyn, H. *et al.* A spatially explicit analysis of seedling recruitment in the  
549            terrestrial orchid *Orchis purpurea*. *New Phytol.* **176**, 448–459 (2004).
- 550    60.    Close, R. C., Moar, N. T., Tomlinson, A. I. & Lowe, A. D. Aerial dispersal of  
551            biological material from Australia to New Zealand. *Int. J. Biometeorol.* **22**, 1–19  
552            (1978).

- 553 61. Gandawijaja, D. & Arditti, J. The orchids of Krakatau: evidence for a mode of  
554 transport. *Ann. Bot.* **52**, 127–130 (1983).
- 555 62. Nakamura, S. J. & Hamada, M. On the seed dispersal of an achlorophyllous  
556 orchid, *Galeola septentrionalis*. *J. Japanese Bot.* **53**, 260–263 (1978).
- 557 63. Pérez-Escobar, O. A., Balbuena, J. A. & Gottschling, M. Rumbling orchids □:  
558 How to assess divergent evolution between chloroplast endosymbionts and the  
559 nuclear host. *Syst. Biol.* **65**, 51–65 (2016).
- 560 64. Rokas, A., Williams, B. L., King, N. & Carroll, S. B. Genome-scale approaches  
561 to resolving incongruence in molecular phylogenies. *Nature* **425**, 798–804  
562 (2003).
- 563 65. Salichos, L., Stamatakis, A. & Rokas, A. Novel information theory-based  
564 measures for quantifying incongruence among phylogenetic trees. *Mol. Biol.*  
565 *Evol.* **31**, 1261–1271 (2014).
- 566 66. Rieseberg, L. H., Beckstrom-Sternberg, S. & Doan, K. *Helianthus annuus* ssp.  
567 *texanus* has chloroplast DNA and nuclear ribosomal RNA genes of *Helianthus*  
568 *debilis* ssp. *cucumerifolius*. *Proc. Natl. Acad. Sci. U. S. A.* **87**, 593–597 (1990).
- 569 67. Rieseberg, L. H. & Soltis, D. E. Phylogenetic consequences of cytoplasmatic  
570 gene flow in plants. *Evol. Trends Plants* **5**, 65–84 (1991).
- 571 68. Gerlach, G. & Schill, R. Composition of Orchid Scents Attracting Euglossine  
572 Bees. *Bot. Acta* **104**, 379–384 (1991).
- 573 69. Dressler, R. L. Pollination by Euglossine Bees. *Evolution (N. Y.)*. **22**, 202–210  
574 (1967).
- 575 70. Williams, H. & Whitten, W. M. Orchid floral fragrances and male euglossine  
576 bees: methods and advances in the last sesquidecade. *Biol. Bull.* **164**, 355–395  
577 (1983).



- 578 71. Gregg, K. B. Variation in floral fragrances and morphology: incipient  
579 speciation in *Cycnoches*? *Bot. Gaz.* **144**, 566–576 (1983).
- 580 72. Irimia, R.-E., A. Pérez-Escobar, O. & Gottschling, M. Strong biogeographic  
581 signal in the phylogenetic relationships of *Rochefortia* Sw. (Ehretiaceae,  
582 Boraginales). *Plant Syst. Evol.* **301**, 1509–1516 (2014).
- 583 73. Katoh, K. & Standley, D. M. MAFFT multiple sequence alignment software  
584 version 7: improvements in performance and usability. *Mol. Biol. Evol.* **30**, 772–  
585 780 (2013).
- 586 74. Balbuena, J. A., Míguez-Lozano, R. & Blasco-Costa, I. PACo: a novel procrustes  
587 application to cophylogenetic analysis. *PLoS One* **8**, e61048 (2013).
- 588 75. Darriba, D., Taboada, G. L., Doallo, R. & Posada, D. jModelTest 2: more  
589 models, new heuristics and parallel computing. *Nat. Methods* **9**, 772–772 (2012).
- 590 76. Stamatakis, A. RAxML version 8: A tool for phylogenetic analysis and post-  
591 analysis of large phylogenies. *Bioinformatics* **30**, 1312–1313 (2014).
- 592 77. Ronquist, F. *et al.* MrBayes 3.2: Efficient Bayesian phylogenetic inference and  
593 model choice across a large model space. *Syst. Biol.* **61**, 539–542 (2012).
- 594 78. Miller, M. A. *et al.* A RESTful API for access to phylogenetic tools via the  
595 CIPRES Science Gateway. *Evol. Bioinforma.* **11**, 43–48 (2015).
- 596 79. Ramírez, S. R., Gravendeel, B., Singer, R. B., Marshall, C. R. & Pierce, N. E.  
597 Dating the origin of the Orchidaceae from a fossil orchid with its pollinator.  
598 *Nature* **448**, 1042–1045 (2007).
- 599 80. Conran, J. G., Bannister, J. M. & Lee, D. E. Earliest orchid macrofossils: Early  
600 Miocene *Dendrobium* and *Earina* (Orchidaceae: Epidendroideae) from New  
601 Zealand. *Am. J. Bot.* **96**, 466–474 (2009).
- 602 81. Drummond, A. J. & Bouckaert, R. R. *Bayesian evolutionary analysis with*

- 603            *BEAST 2*. (Cambridge University Press, 2014).
- 604    82.    Chomicki, G. *et al.* The velamen protects photosynthetic orchid roots against  
605            UV-B damage , and a large dated phylogeny implies multiple gains and losses of  
606            this function during the Cenozoic. *New Phytol.* **205**, 1330–1341 (2014).
- 607    83.    Givnish, T. J. *et al.* Orchid historical biogeography , diversification , Antarctica  
608            and the paradox of orchid dispersal. 1–12 (2016). doi:10.1111/jbi.12854
- 609    84.    Xie, W., Lewis, P. O., Fan, Y., Kuo, L. & Chen, M. H. Improving marginal  
610            likelihood estimation for bayesian phylogenetic model selection. *Syst. Biol.* **60**,  
611            150–160 (2011).
- 612    85.    Carr, G. F. J. The genus *Cycnoches* and its species Part 4: modern studies of  
613            pollinators. *Orchid Rev.* 221–225 (2006).
- 614    86.    Romero, G. A. in *Genera Orchidacearum: Vol . 5. Epidendroideae (part two)*  
615            (eds. Pridgeon, A. M., Cribb, P. J., Chase, M. W. & Rasmussen, F. N.) 11–40  
616            (Oxford University Press, 2009).
- 617    87.    Töpel, M. *et al.* SpeciesGeoCoder: Fast categorisation of species occurrences for  
618            analyses of biodiversity, biogeography, ecology and evolution. *BioRxiv* **9274**, 1–  
619            15 (2014).
- 620    88.    Morrone, J. J. Biogeographic areas and transition zones of Latin America and the  
621            Caribbean islands based on panbiogeographic and cladistic analyses of the  
622            entomofauna. *Annu. Rev. Entomol.* **51**, 467–494 (2006).
- 623    89.    Matzke, N. J. Model selection in historical biogeography reveals that founder-  
624            event speciation is a crucial process in island clades. *Syst. Biol.* **63**, syu056-  
625            (2014).
- 626
- 627

628 **Acknowledgements**

629 We are grateful to Martina Silber (Munich, Germany) for valuable assistance in  
630 the lab, to Mario Blanco (San José, Costa Rica), Diego Bogarín (San José, Costa Rica),  
631 Norman Cash and family (Managua, Nicaragua) for the great help provided during field  
632 trip, to Boris Schlumpberger (Hannover, Germany), Andres Maduro (Panama City,  
633 Panama), Ivan G. Alvarez (David, Panama), Lankester Botanical Garden (Cartago,  
634 Costa Rica), Gustavo Romero (Herbarium HUH, Cambridge, U.S.A) and University of  
635 Costa Rica for providing plant material. We also thank the Smithsonian Tropical  
636 Research Institute (Panama City) and Costa Rican Ministry of Environment (MINAET)  
637 for providing research permits (No. SE/AP-20-13 and 026-2013-SINAC, respectively).  
638 We finally thank Alexandre Antonelli (Gothenburg, Sweden), for granting access to  
639 graphical material employed in Fig. 3. This work was supported by the Colombian  
640 Administrative Department of Science and Technology (COLCIENCIAS; granted to  
641 OAPE). We thank the Deutsche Forschungsgemeinschaft (granted to GG, GE 828/12-1)  
642 for financial support.

643

644 **Author contributions**

645 O.A.P.E., M.G. and F.L.C. designed research; G.G. and O.A.P.E. collected samples;  
646 O.A.P.E. and E.P. performed all the lab work; O.A.P.E., F.L.C., and G.C. performed all  
647 analyses; O.A.P.E., M.G., F.C., G.C., G.G., B.K. and E.P. wrote the manuscript under  
648 the lead of O.A.P.E., M.G, and F.C.

649

650

651

652

653 **Competing financial interest**

654 The authors declare no competing financial interest.

## Tables

**Table 1.** Marginal likelihoods of tree speciation models for relaxed and strict molecular clocks.

**Table 2.** Likelihood of biogeographic models as implemented in DEC, DIVA-like and BayArea-like.

## Figures

**Figure 1.** Best scoring, ML tree of *Cycnoches* obtained from concatenated **A)** nuclear ETS, ITS, *Xdh* and **B)** plastid *trnS-G*, *ycf1* loci. Node charts indicate Bootstrap Support (BS > 75), in where fully red diagrams indicate BS of 100. Numbers at nodes indicate Bayesian Posterior Probability (PP > 0.95). Representatives of each clade are shown in pictures: **1)** *C. haagii*; **2)** *C. ventricosum* (left) and *C. pentadactylon* (right); **3)** *C. herrenhusanum* (left) and *C. peruvianum* (right). The red arrows indicate autapomorphies of every clade: in 1) fleshy oblong, curved pair set of calli located towards the base of the labellum, 2) labellum blade entire to 4-lobed, and 3) labellum with 8-10 marginal projections. Geopolitical boundaries map generated by ArcMAP software (<http://www.esri.com>), using layers freely available at <http://www.diva-gis.org/Data>. Photos: O. Pérez & G.Gerlach.

**Figure 2.** Best scoring, ML tree of *Cycnoches* obtained from concatenated, non-conflicting ‘nuc’ ETS, ITS, and *Xdh* and ‘cp’ *trnS–trnG* and *ycf1* loci. Node charts indicate Bootstrap Support (BS > 75), in where fully red diagrams indicate BS of 100. Numbers at nodes indicate Bayesian Posterior Probability (PP > 0.95).

**Figure 3.** Chronogram for *Cycnoches* obtained under a relaxed clock model, applied to a non-conflicting, concatenated ‘nuc’ (ITS, ETS, *Xdh*) and ‘cp’ loci (*trnS–trnG*, *ycf1*). Age

estimates, including maximum and minimum intervals for all nodes, are provided in Figure S5. Time scale is provided in million years ago (Mya). Node charts correspond to ancestral areas estimated under the BayArea-Like\* model, including founder event process (*J*). Pink, orange and blue lines indicate mean elevations (m) on Colombian and Venezuelan Northern Andes, respectively (adapted from Hoorn et al., 2010). (Inset) Coded areas used for biogeographical analysis. Geopolitical boundaries map generated by ArcMAP software (<http://www.esri.com>). Political divisions and elevation data from DIVA-GIS (<http://www.diva-gis.org/gdata>).

### **Supplementary material**

**Appendix S1.** Extended Materials and Methods, supplementary tables and figures.

**Table 1**

|                      | <b>Tree prior</b>  | <b>MLE (SS)</b> | <b>CV</b> | <b>Yule</b> | <b>BD</b> | <b>BD sampling</b> | <b>Yule</b> | <b>BD</b> | <b>BD sampling</b> |
|----------------------|--------------------|-----------------|-----------|-------------|-----------|--------------------|-------------|-----------|--------------------|
| <b>Strict clock</b>  | <b>Yule</b>        | -14280,93       | -         | -           |           |                    |             |           |                    |
|                      | <b>BD</b>          | -14267,36       | -         | 27,14       | -         |                    |             |           |                    |
|                      | <b>BD sampling</b> | -14264,73       | -         | 32,4        | 5,26      | -                  |             |           |                    |
| <b>Relaxed clock</b> | <b>Yule</b>        | -14259,53       | 0,42      | 42,8        | 15,66     | 10,4               | -           |           |                    |
|                      | <b>BD</b>          | -14245,01       | 0,35      | 71,84       | 44,7      | 39,44              | 29,04       | -         |                    |
|                      | <b>BD sampling</b> | -14244,47       | 0,35      | 72,92       | 45,78     | 40,52              | 30,12       | 1,08      | -                  |

**Table 2**

| <b>Model</b>      | <b>LnL</b>         | <b>AIC</b>         | <b>AICc</b>        | <b>AIC weighted</b> |
|-------------------|--------------------|--------------------|--------------------|---------------------|
| DEC               | -119,3054256       | 242,6108513        | 242,9744877        | 1,06E-08            |
| DEC+J             | -110,4860209       | 226,9720418        | 227,7220418        | 2,63E-05            |
| DEC*              | -106,2412542       | 216,4825085        | 216,8461448        | 0,004984487         |
| DEC+J*            | -103,9600773       | 213,9201546        | 214,6701546        | 0,017948515         |
| DIVA              | -125,2827663       | 254,5655327        | 254,929169         | 2,68E-11            |
| DIVA+J            | -123,1895028       | 252,3790055        | 253,1290055        | 7,99E-11            |
| DIVA*             | -104,1616852       | 212,3233704        | 212,6870068        | 0,039880977         |
| DIVA+J*           | -104,9727468       | 215,9454937        | 216,6954937        | 0,006519762         |
| BAYAREA           | -131,2239925       | 266,4479849        | 266,8116213        | 7,04E-14            |
| BAYAREA+J         | -113,2503658       | 232,5007317        | 233,2507317        | 1,66E-06            |
| BAYAREA*          | -119,7393191       | 243,4786382        | 243,8422745        | 6,85E-09            |
| <b>BAYAREA+J*</b> | <b>-100,011714</b> | <b>206,0234279</b> | <b>206,7734279</b> | <b>0,930638293</b>  |



Figure 1.

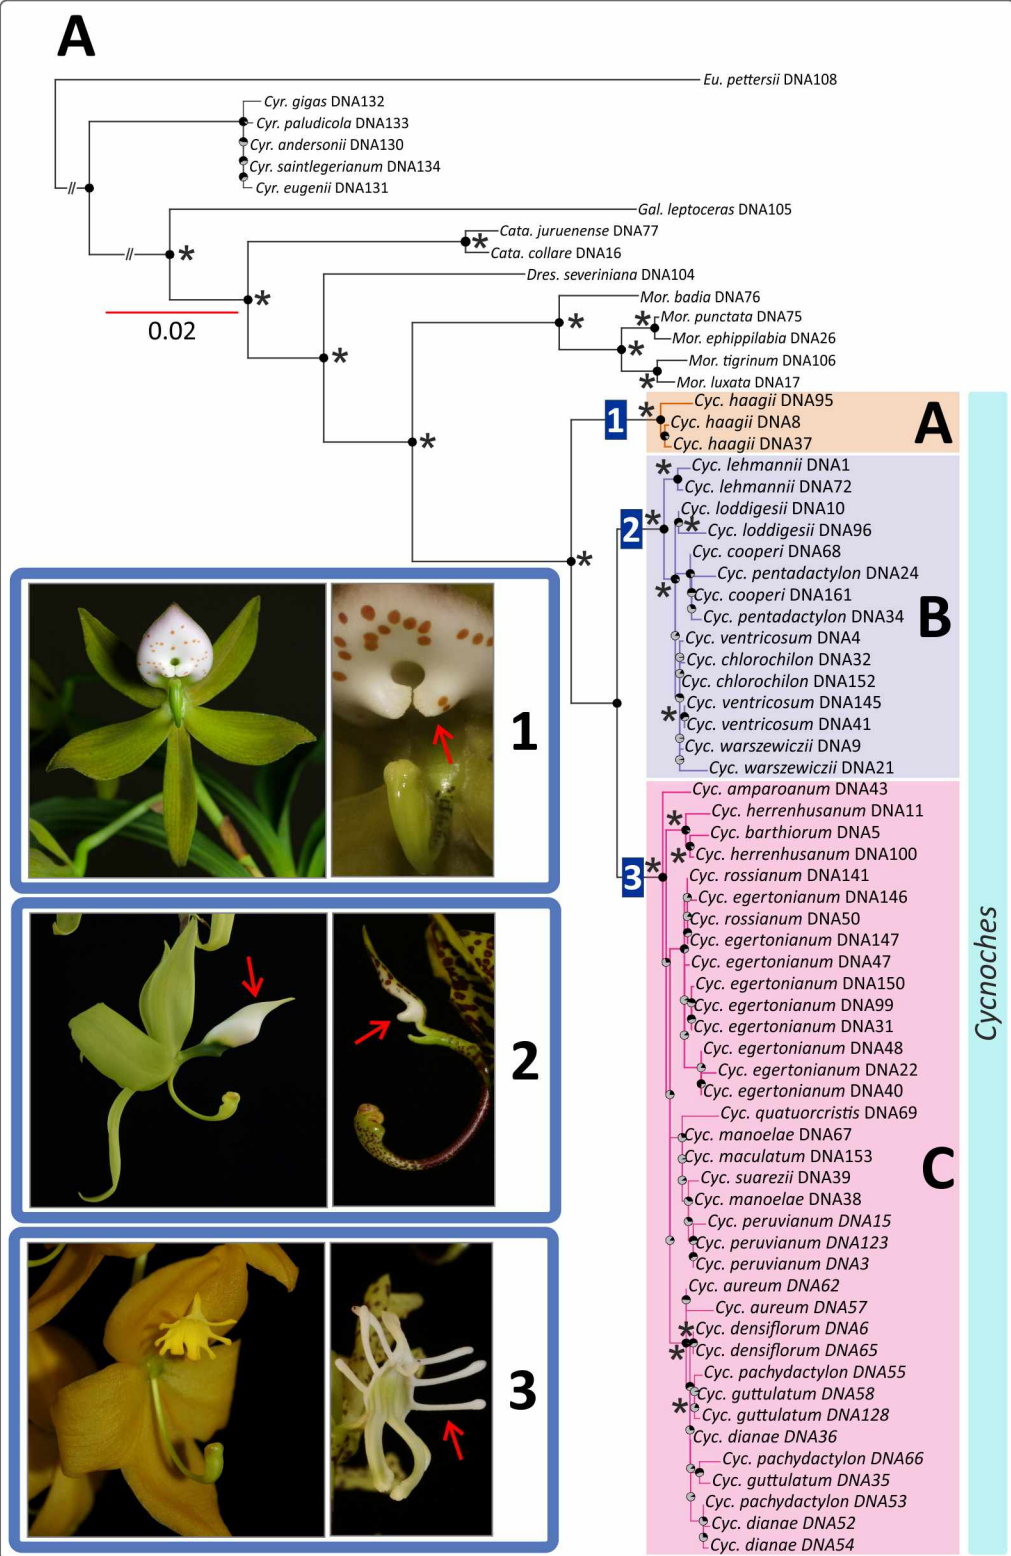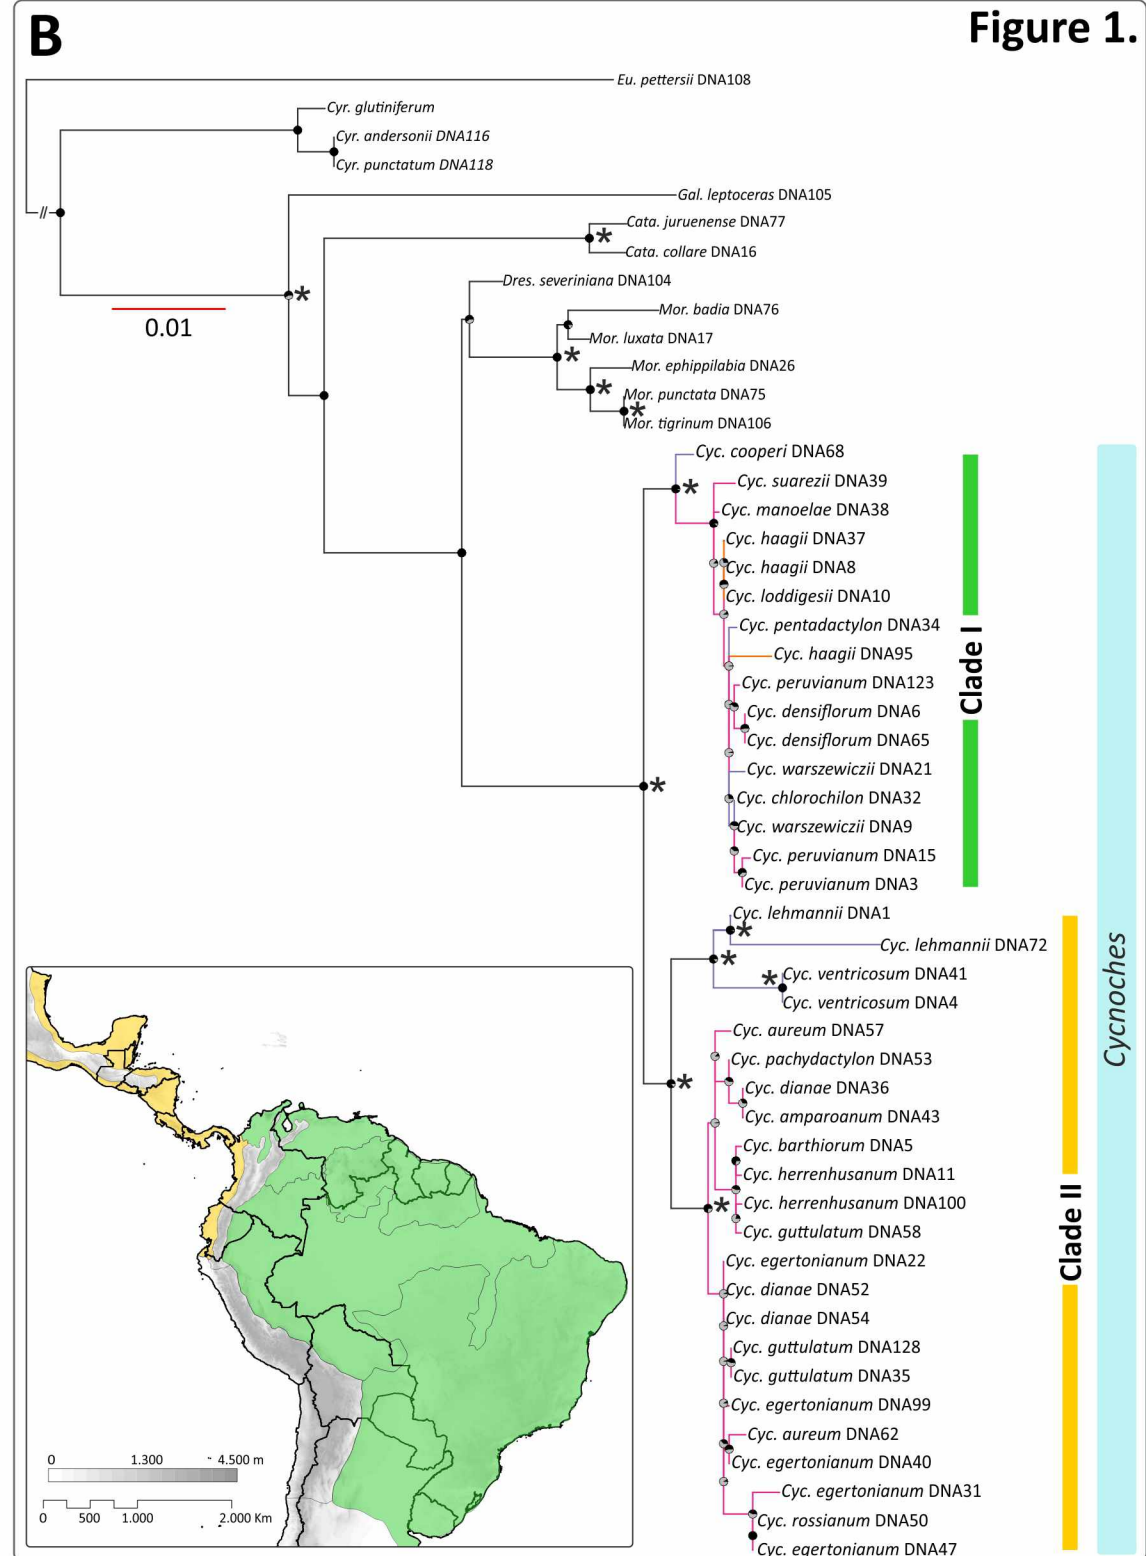

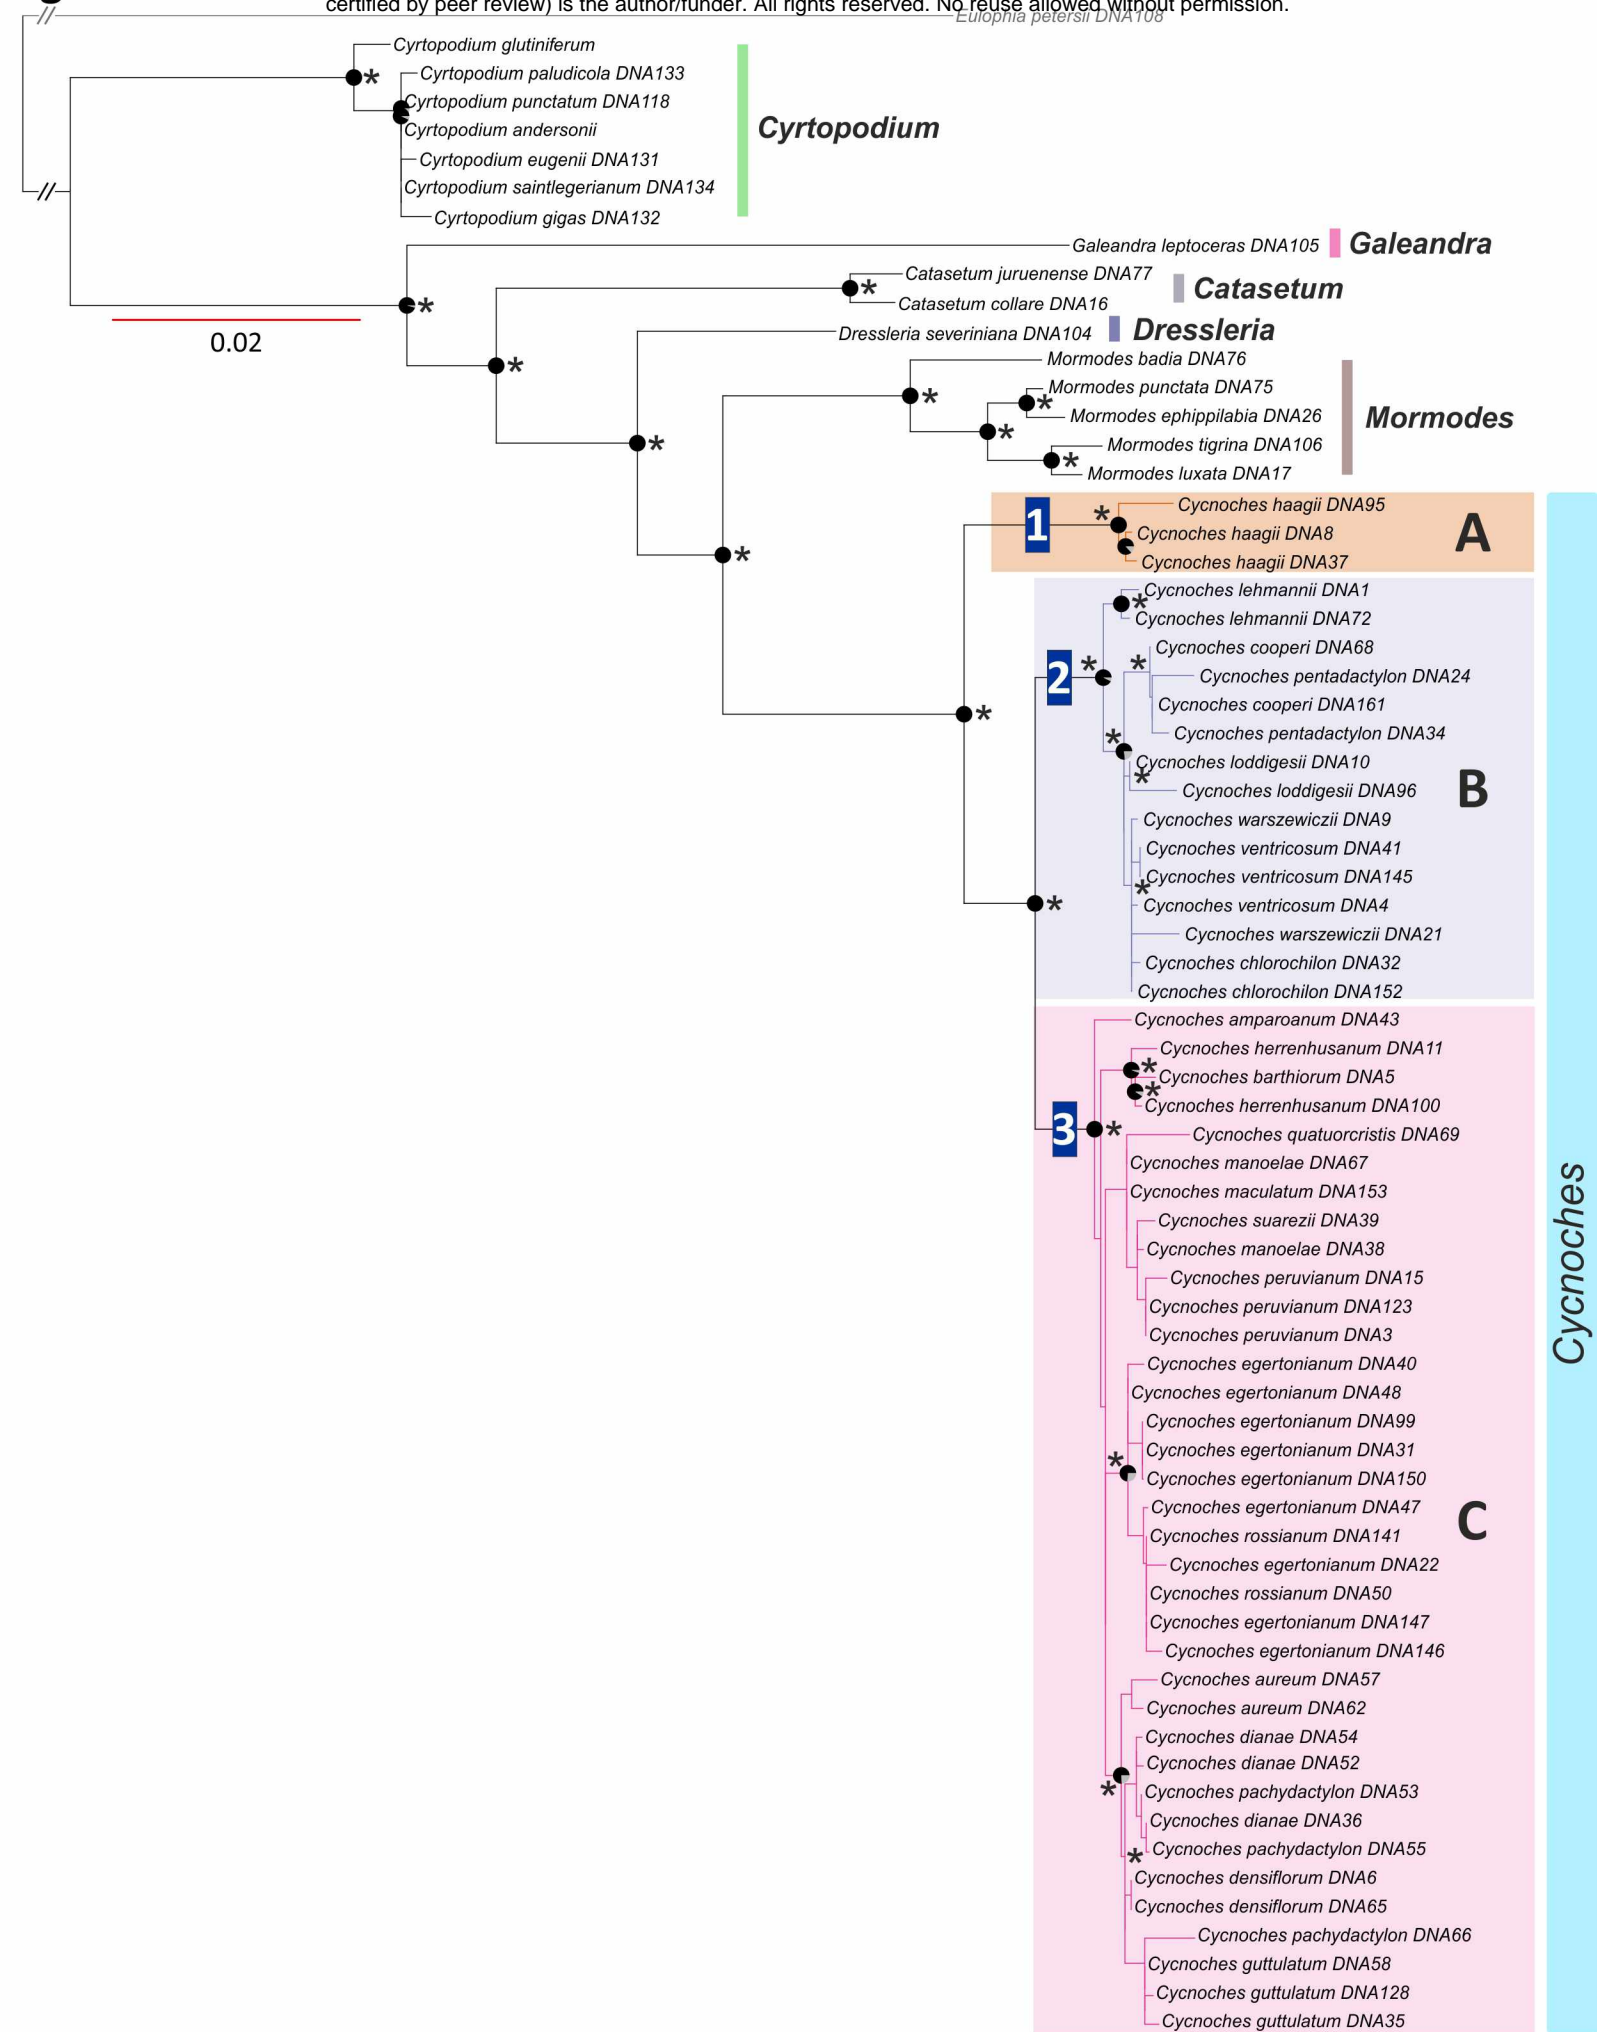

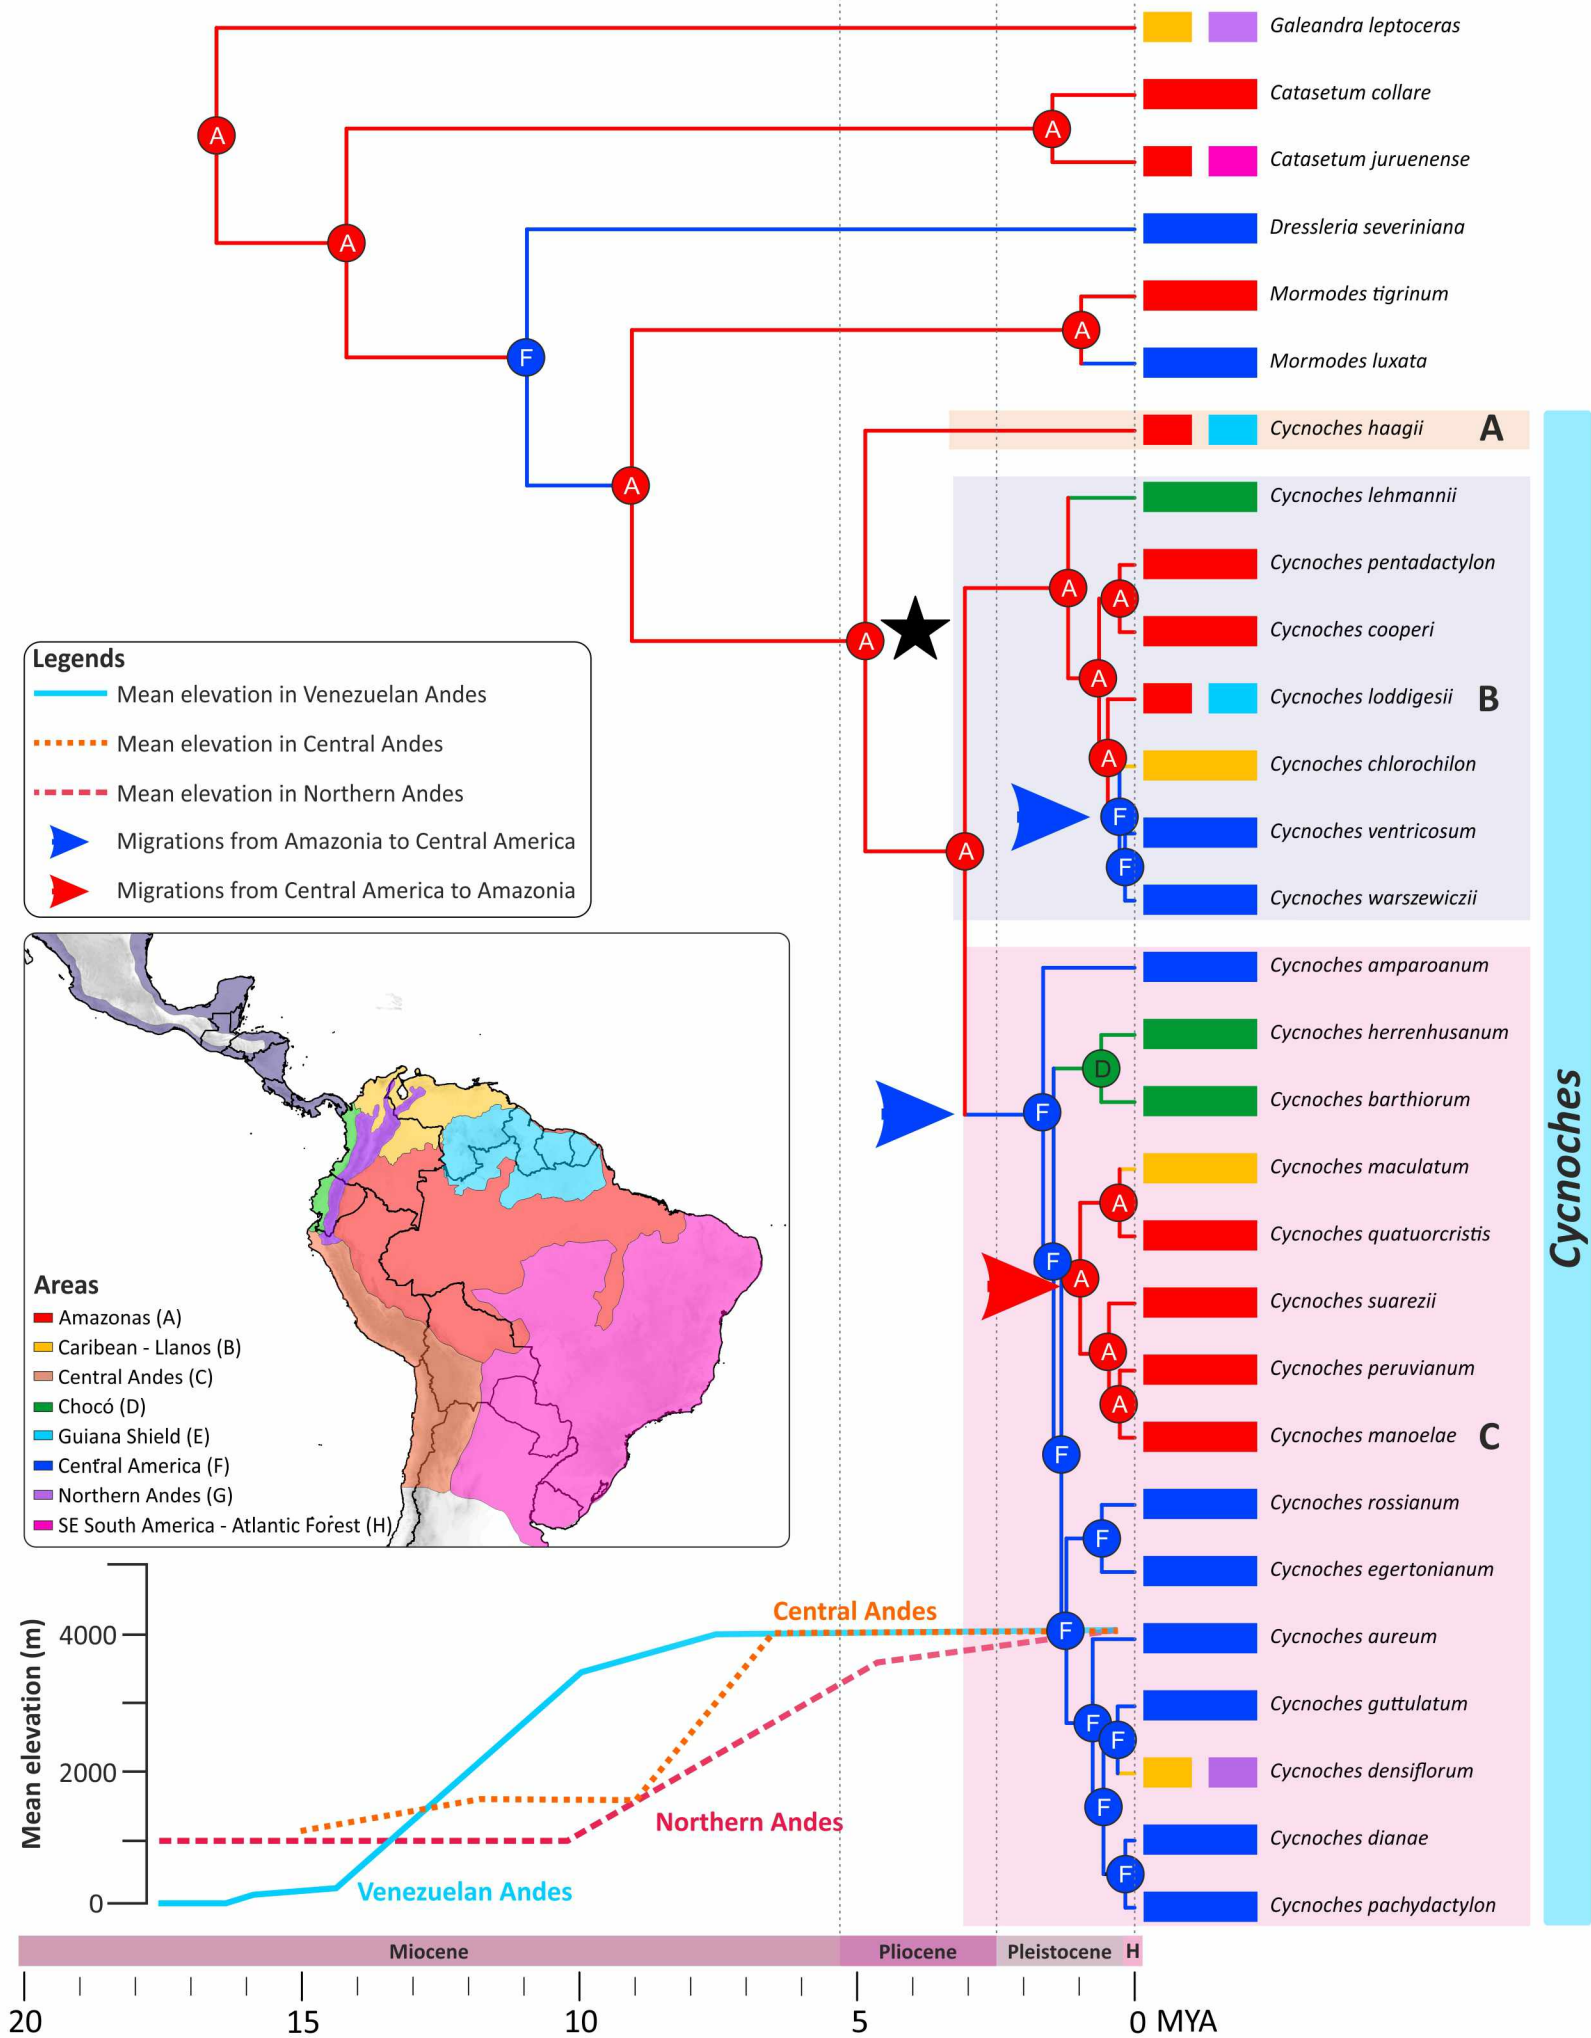

Source: http://biorxiv.org/content/10.1101/106393v1.full.pdf
